# Supplementary material for: Bimetallic bis-Aroyldihydrazone-Isatin Complexes of High O=V(IV) and Low Cu(II) Valent Ions as Effective Biological Reagents for Antimicrobial and Anticancer Assays
Source: MDPI journal article supplement (doi:10.3390/molecules29020414), 2024-01-15
Supplement: s1 [file s1]

## Supplementary materials

### Bimetallic *bis*-Aroyldihydrazone-Isatin Complexes of High O=V(IV) and Low Cu(II) Valent Ions as Effective Biological Reagents for Antimicrobial and Anticancer Assays

Ahmed Khalil<sup>1,2,\*</sup> and Mohamed Shaker S. Adam<sup>1,3</sup>

<sup>1</sup>Department of Chemistry, College of Science, King Faisal University, P.O. Box 400, Al-Ahsa 31982, Saudi Arabia

<sup>2</sup>Chemistry Department, Faculty of Science, Zagazig University, Zagazig 44519, Egypt

<sup>3</sup>Department of Chemistry, Faculty of Science, Sohag University, Sohag 82534, Egypt

\*Correspondence: akkhalil@kfu.edu.sa

#### 2.1. Devices and methodologies

The essential materials used in the current study (without rehandling) were obtained from various suppliers (BDH, Sigma-Aldrich and Merck). In particular, the main element percentages of C, H and N in H<sub>2</sub>Lph, VOLph and CuLph were estimated at an ambient temperature within the V2.3 model of the GMBH varioEI device. For the determination of the melting and/or decomposition points, a Gallenkamp–Sanyo-type apparatus was utilized. Also, at 25 °C, the molar conducting power of VOLph and CuLph (with concentration =  $1.0 \times 10^{-3}$  mol dm<sup>-3</sup>) was studied in polar medium of *N,N*-dimethylformamide (DMF) or dimethyl sulfoxide (DMSO) using a Jenway conductivity meter apparatus. Studying the nuclear magnetic resonance spectroscopy (<sup>1</sup>H- and <sup>13</sup>C-nuclei) for the ligand H<sub>2</sub>Lph in DMSO-*d*<sub>6</sub> at 25 °C was achieved using an FT-NMR Bruker multinuclear spectrophotometric device (ARX400 model), in which the field magnetism for <sup>1</sup>H- and <sup>13</sup>C-nuclei was employed at 400.1 and 100.6 MHz, respectively. At 25 °C, FTIR spectra for H<sub>2</sub>Lph, VOLph and CuLph (as solid samples) were studied using a FT-IR spectrophotometer from Agilent Technology (Cary-630 model). The electronic spectrometric titrations for the solutions in DMF with concentrations of  $1.0 \times 10^{-6}$  mol dm<sup>-3</sup> for H<sub>2</sub>Lph, VOLph and CuLph were examined at 25 °C using a Shimadzu spectrophotometer (UV-1800 model). MS (m/z) mass spectra for H<sub>2</sub>Lph, VOLph and CuLph in DMF were obtained using a mass spectrometric machine (model of Qtof Micro YA263). Magnetic features of the studied complexes were evaluated based on a magnetic susceptibility balance (Sherwood Scientific).

## List of Tables

**Table S1.** Activity index (%) of the antibacterial assay for H<sub>2</sub>Lph, VOLph and CuLph reagents.

| Comp.              | Activity index (%)   |               |                 |
|--------------------|----------------------|---------------|-----------------|
|                    | S. Marcescence (-ve) | E. Coli (-ve) | S. Aureus (+ve) |
| H <sub>2</sub> Lph | 47.5                 | 48.7          | 41.3            |
| VOLph              | 90.0                 | 81.1          | 84.8            |
| CuLph              | 87.5                 | 78.4          | 82.6            |

**Table S2.** Activity index (%) of the antifungal assay for H<sub>2</sub>Lph, VOLph and CuLph reagents.

| Comp.              | Activity index (%) |           |           |
|--------------------|--------------------|-----------|-----------|
|                    | C. albicans        | A. flavus | T. rubrum |
| H <sub>2</sub> Lph | 45.9               | 52.0      | 51.6      |
| VOLph              | 67.6               | 80.0      | 90.3      |
| CuLph              | 70.3               | 80.0      | 87.1      |

**Table S3.** *IC*<sub>50</sub>, the antiproliferative index of H<sub>2</sub>Lph, VOLph and CuLph reagents versus the current human cancer cell lines.

| Comp.              | <i>IC</i> <sub>50</sub> (μM) |            |            |             |
|--------------------|------------------------------|------------|------------|-------------|
|                    | HCT-116                      | MCF-7      | HepG-2     | WI-38       |
| H <sub>2</sub> Lph | 67.56±0.12                   | 43.00±0.55 | 56.75±0.50 | 128.15±0.25 |
| VOLph              | 38.30±0.72                   | 25.10±0.36 | 38.05±0.25 | 92.70±0.90  |
| CuLph              | 39.09±0.64                   | 25.25±0.45 | 37.80±0.45 | 117.36±0.33 |
| Vinblastine        | 13.30±0.11                   | 4.12±0.14  | 7.50±0.10  | --          |

## List of Figures

HLC-6  
proton\_su DMSO {C:\nmr-data} Student 10

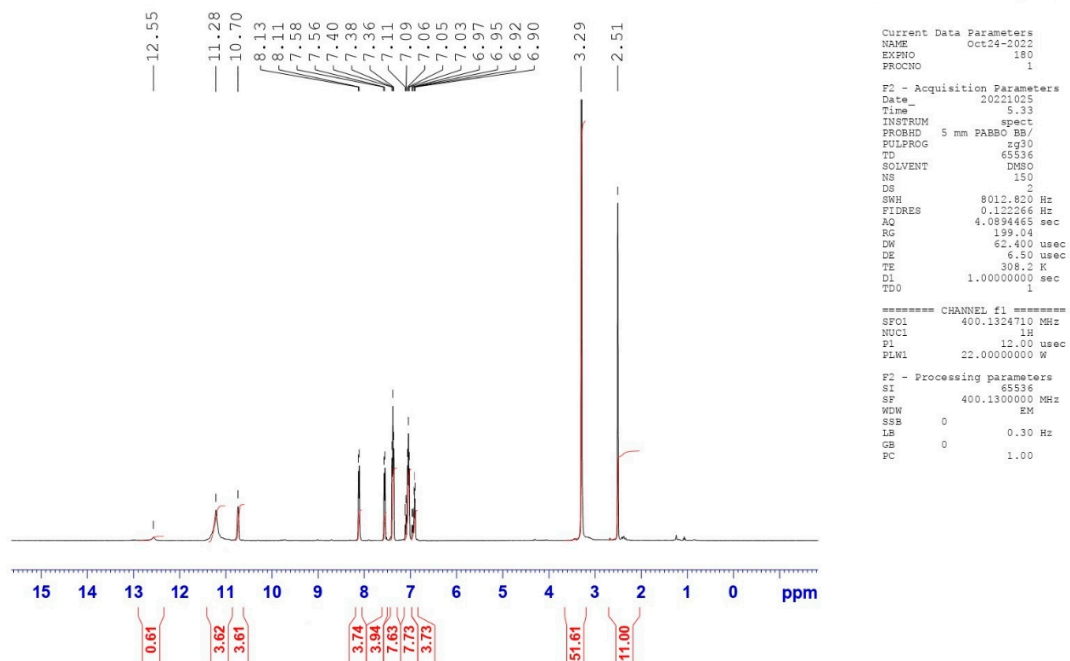

Figure S1. <sup>1</sup>H NMR spectrum of H<sub>2</sub>Lph in DMSO-*d*<sub>6</sub> at 25 °C.

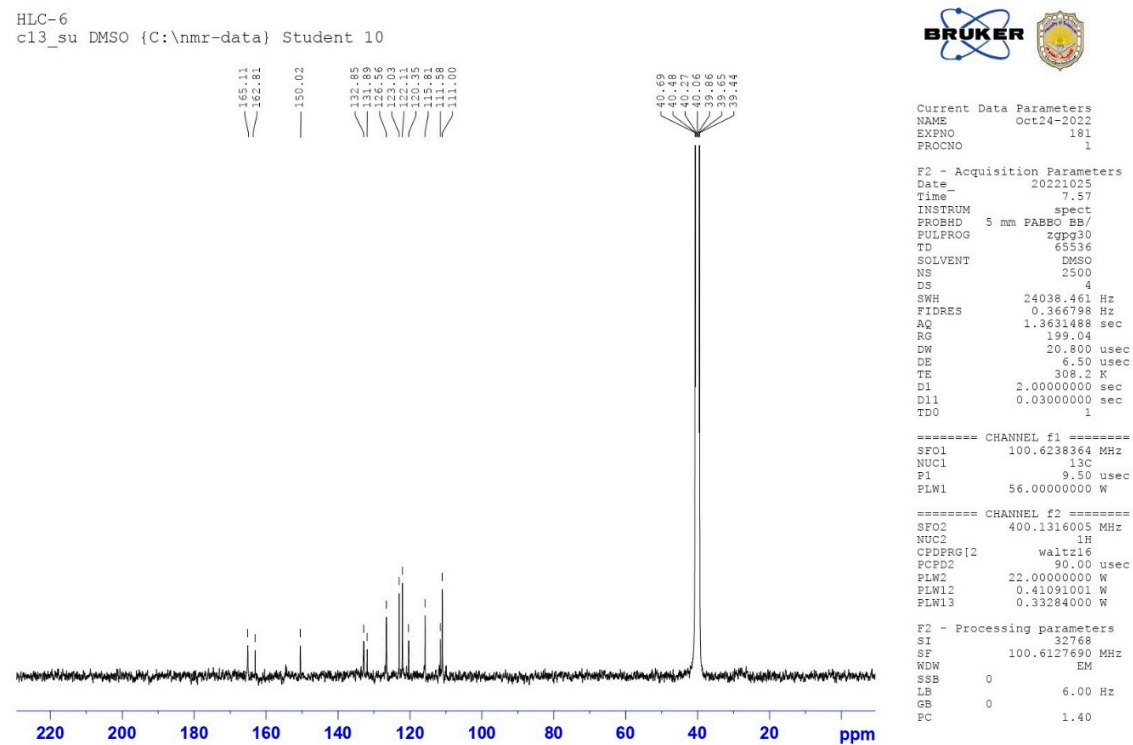

**Figure S2.**  $^{13}\text{C}$ NMR spectrum of  $\text{H}_2\text{Lph}$  in  $\text{DMSO}-d_6$  at 25 °C.

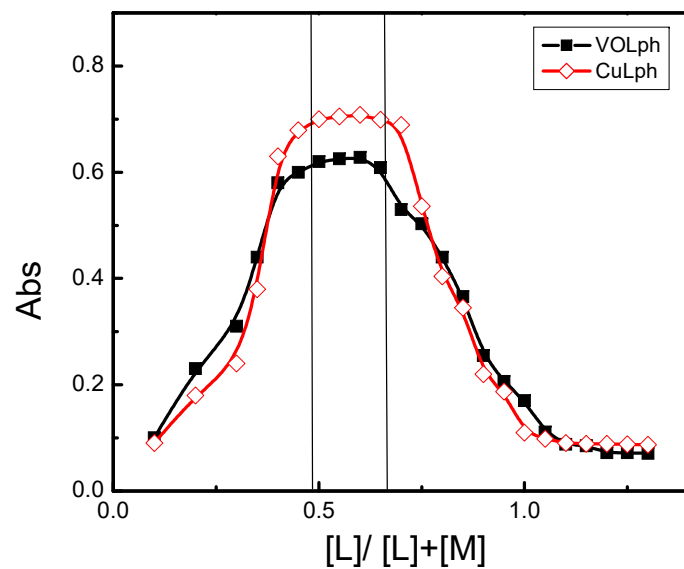

**Figure S3.** Continuous variation plot for the stoichiometric molar ratios for VOLph and CuLph complexation formed with H<sub>2</sub>Lph in DMF media at  $[L] = [\text{VO}^{2+}]$  or  $[\text{Cu}^{2+}] = 1 \times 10^{-5} \text{ mol dm}^{-3}$  and 25 °C.

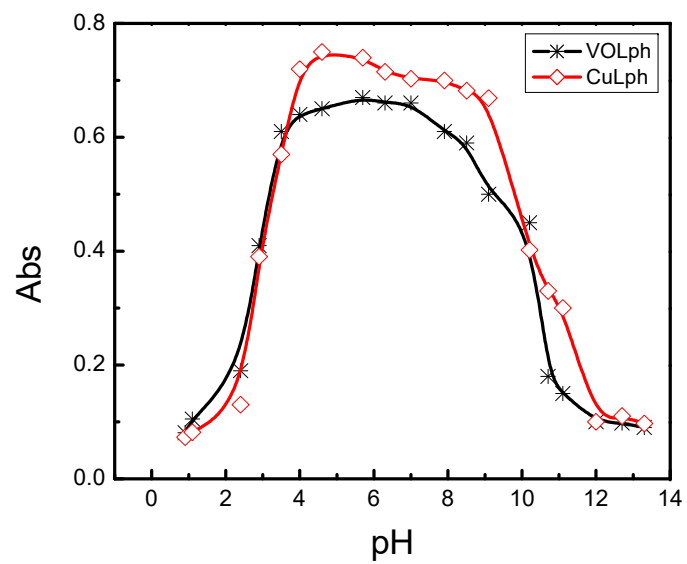

**Figure S4.** pH effect stability of an DMF solution of VOLph and CuLph complexes.

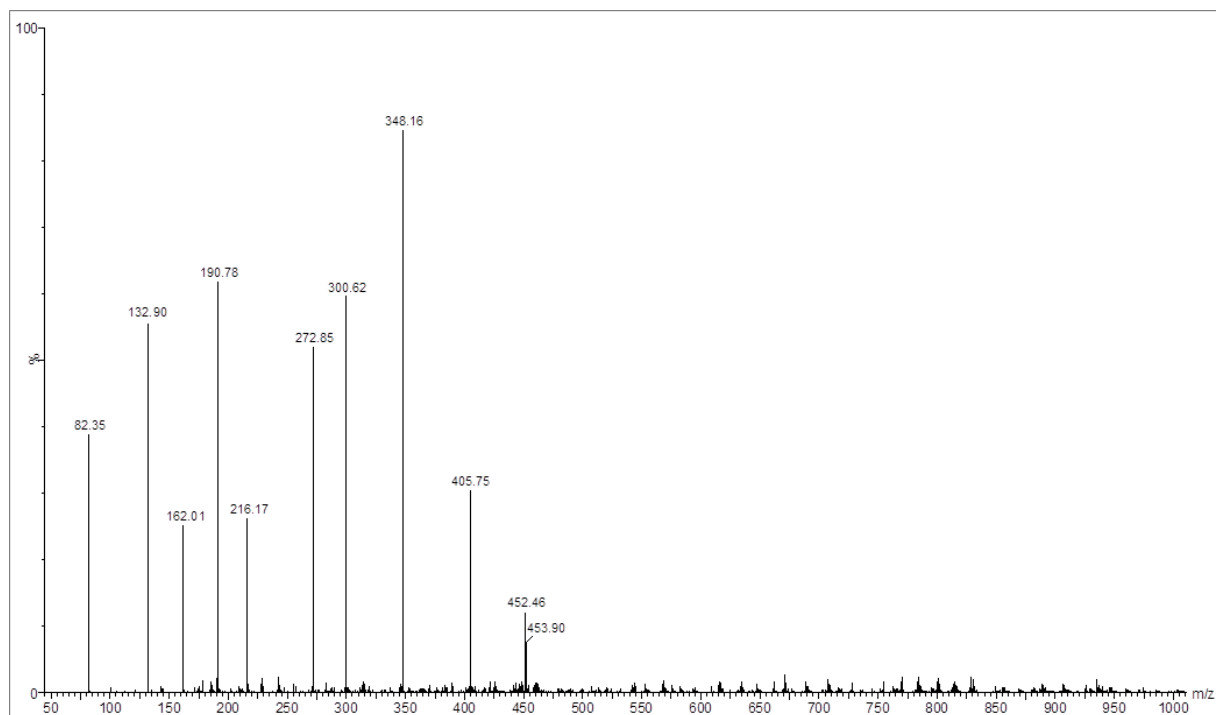

**Figure S5.** EI-Mass spectrum of H<sub>2</sub>Lph in DMF media at 25 °C.

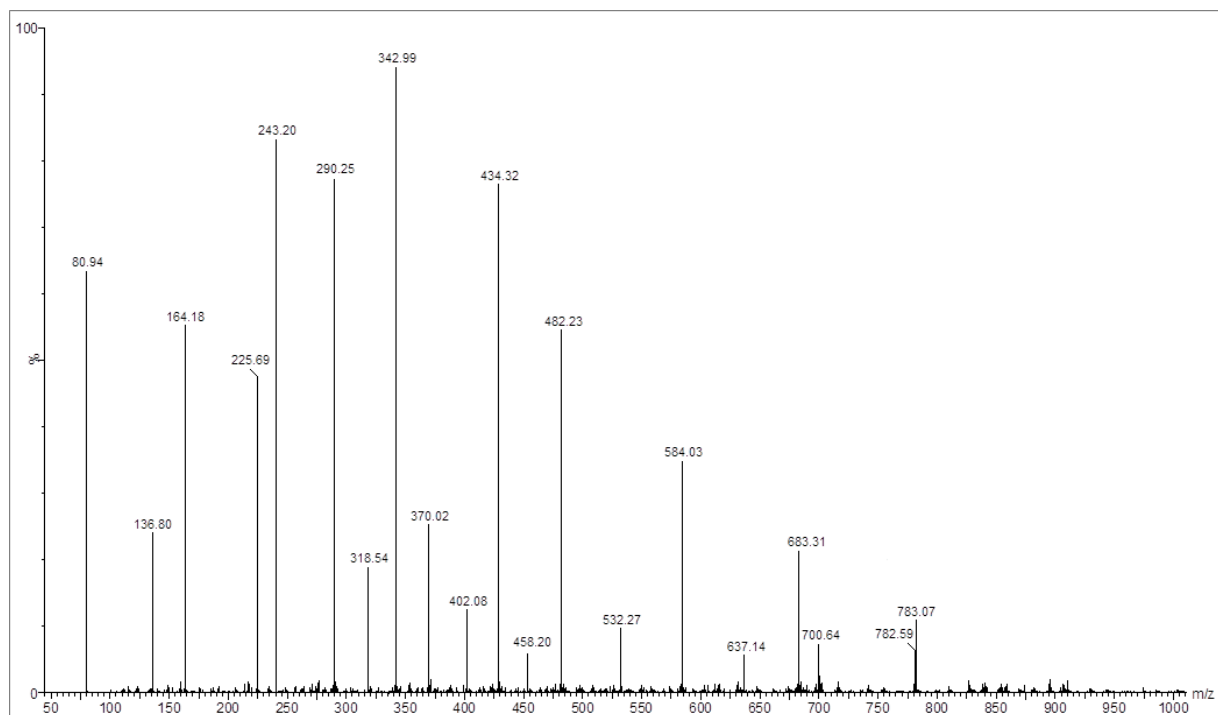

**Figure S6.** EI-Mass spectrum of VOLph in DMF media at 25 °C.



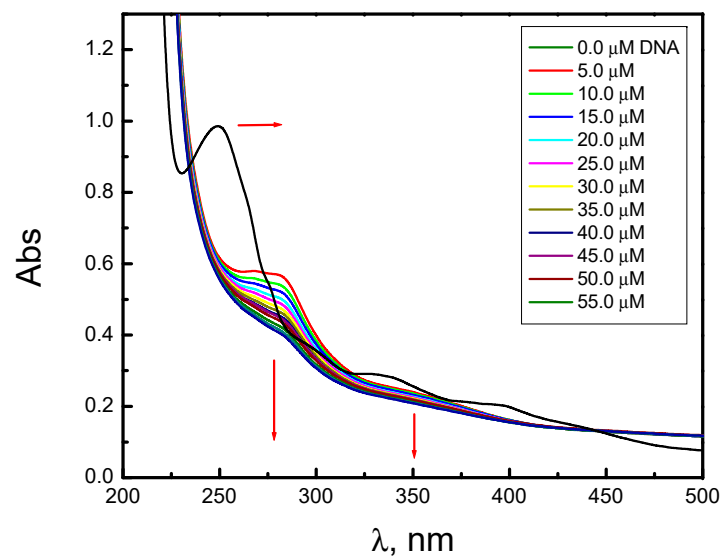

**Figure S7.** The spectral changes for the electronic transitions for H<sub>2</sub>Lph solutions with [DNA] of different *ct*DNA concentrations in DMSO, in  $\mu$ M (at 25 °C).
